# Supplementary material
Source: Springer Nature journal article supplement (https://www.springermedizin.de/resource/supplementary/12911_2011_624_MOESM7_ESM.pdf/9525928)

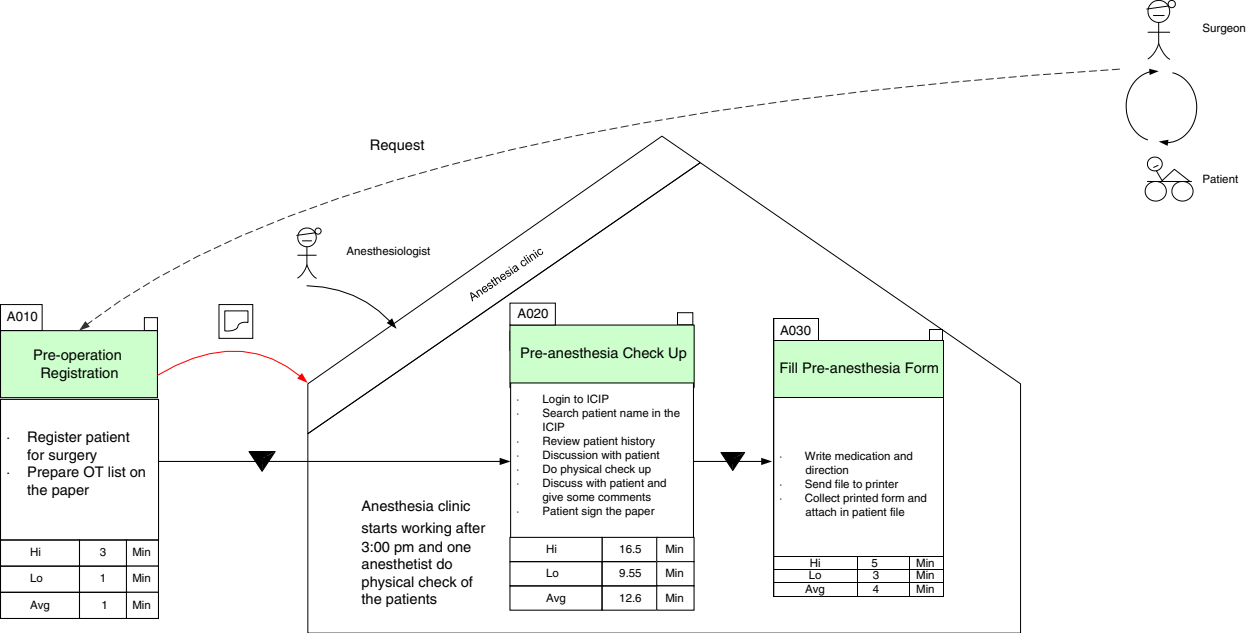

|     |      |     |
|-----|------|-----|
| Hi  | 1    | Min |
| Lo  | 0.45 | Min |
| Avg | 0.5  | Min |

|     |      |     |
|-----|------|-----|
| Hi  | 0.16 | Sec |
| Lo  | 0    | Sec |
| Avg | 0.03 | Sec |

|           |       |     |
|-----------|-------|-----|
| Total NVA | 0.53  | Min |
| Total VA  | 17.6  | Min |
| NVA %     | 2.93  | %   |
| VA %      | 97.07 | %   |

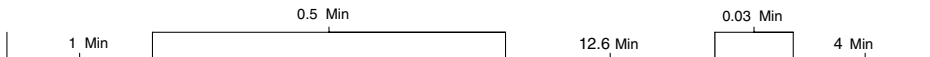

Supplement: MOESM7 [file 9525928]
